# Supplementary material for: Changes in Porcine Corpus Luteum Proteome Associated with Development, Maintenance, Regression, and Rescue during Estrous Cycle and Early Pregnancy
Source: MDPI journal article supplement (doi:10.3390/ijms222111740), 2021-10-29
Supplement: s1 [file s1]

**Table S1.** Progesterone (P4) concentration in blood plasma in gilts on day 3, 9, 12 and 15 of estrous cycle and day 15 of pregnancy. Data are expressed as mean  $\pm$  SEM.

| Day                     | P4 (ng/mL)*                     |
|-------------------------|---------------------------------|
| Day 3 of estrous cycle  | 5.38 $\pm$ 1.567 <sup>a</sup>   |
| Day 9 of estrous cycle  | 29.94 $\pm$ 10.86 <sup>bd</sup> |
| Day 12 of estrous cycle | 47.66 $\pm$ 16.24 <sup>b</sup>  |
| Day 15 of estrous cycle | 20.92 $\pm$ 3.527 <sup>cd</sup> |
| Day 15 of pregnancy     | 42.871 $\pm$ 8.58 <sup>b</sup>  |

\* Different letter indicate statistically significant differences, where  $P < 0.01$
