# Supplementary material for: Changes in Porcine Corpus Luteum Proteome Associated with Development, Maintenance, Regression, and Rescue during Estrous Cycle and Early Pregnancy
Source: MDPI journal article supplement (doi:10.3390/ijms222111740), 2021-10-29
Supplement: s1 [file s1]

**Supplementary Table S7. List of antibodies used in study.**

| Peptide/Protein Target                  | Name of Antibody                                                                                 | Catalog No.,<br>Name of Source | Species Raised in<br>Monoclonal or<br>Polyclonal | Dilution<br>used |
|-----------------------------------------|--------------------------------------------------------------------------------------------------|--------------------------------|--------------------------------------------------|------------------|
| <b>Immunofluorescence</b>               |                                                                                                  |                                |                                                  |                  |
| APOA1                                   | Anti-APOA1 Antibody                                                                              | ab64308<br>Abcam               | Rabbit, polyclonal                               | 1:50             |
| Anti-beta actin<br>antibody             | FITC Anti-beta Actin<br>antibody [AC-15]                                                         | ab6277<br>Abcam                | Mouse, monoclonal                                | 1:1000           |
| Anti-Rabbit,<br>secondary<br>antibodies | Donkey anti-Rabbit IgG<br>(H+L) Highly Cross-<br>Adsorbed Secondary<br>Antibody, Alexa Fluor 594 | A-21207<br>Invitrogen          | Donkey, polyclonal                               | 1:500            |
| <b>Western blot</b>                     |                                                                                                  |                                |                                                  |                  |
| APOA1                                   | Anti-APOA1 Antibody                                                                              | ab64308<br>Abcam               | Rabbit, polyclonal                               | 1:500            |
| HSP27                                   | Anti-HSP27 Antibody                                                                              | ab2790<br>Abcam                | Mouse, monoclonal                                | 1:500            |
| CP                                      | Anti-CP Antibody                                                                                 | ab110449<br>Abcam              | Rabbit, polyclonal                               | 1:1000           |
| GC                                      | Anti-GC Antibody                                                                                 | ab65636<br>Abcam               | Rabbit, polyclonal                               | 1:500            |
| ACTB                                    | Anti-ACTB Antibody                                                                               | ab8227<br>Bio-Rad              | Rabbit, polyclonal                               | 1:1000           |
| Anti-rabbit,<br>secondary<br>antibodies | Anti-Rabbit IgG – ALP<br>antibody produced in goat                                               | A3812<br>Sigma-Aldrich         | Goat, polyclonal                                 | 1:20000          |
| Anti-mouse,<br>secondary<br>antibodies  | Anti-Mouse IgG – ALP<br>antibody produced in goat                                                | A3562<br>Sigma-Aldrich         | Goat, polyclonal                                 | 1:20000          |
